# Supplementary material
Source: PubMed Central journal article supplement (PMC6086175)
Supplement: tpmd170887.SD1.pdf [file tpmd170887.SD1.pdf]

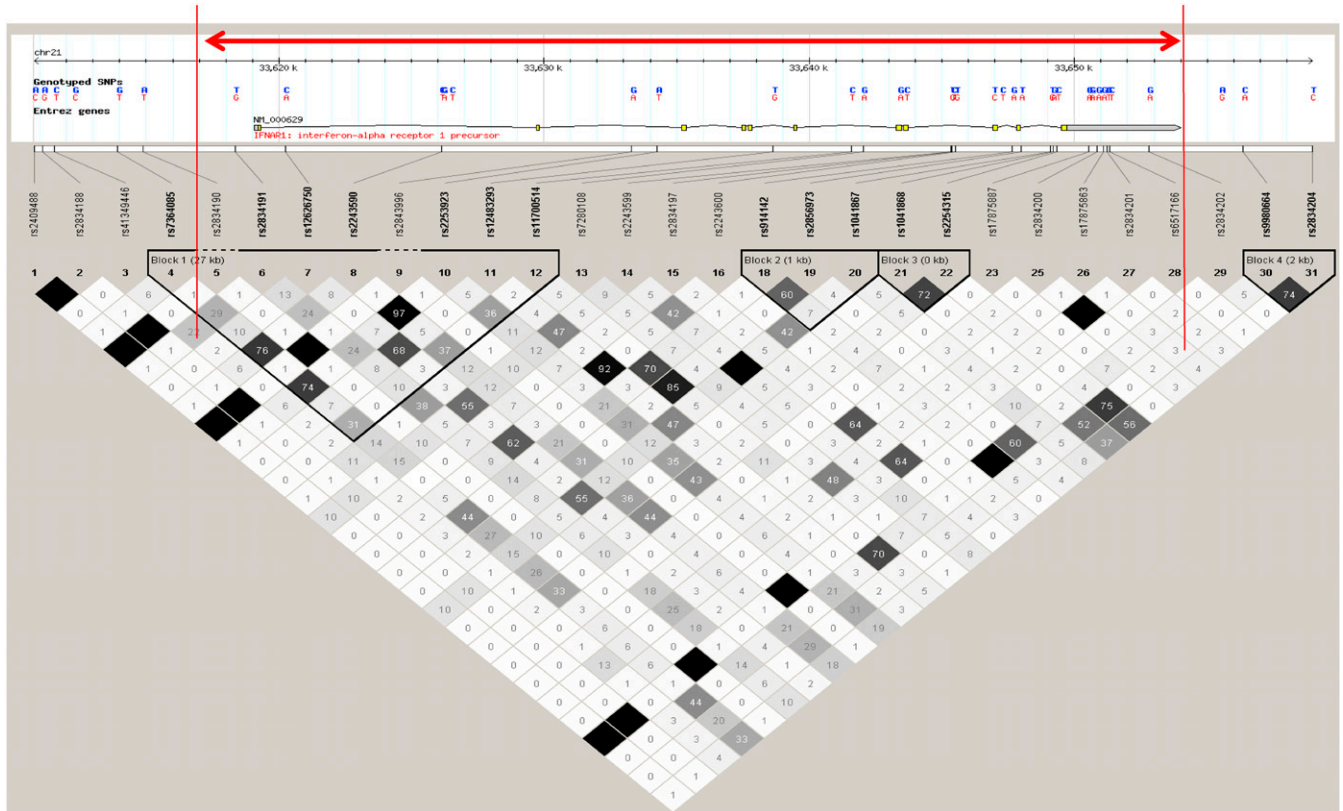

SUPPLEMENTAL FIGURE 1. Linkage disequilibrium map of tagging SNPs in interferon-alpha receptor 1 (IFNAR1) gene from the Yoruba, Nigeria (YRI) HapMap database for malaria disease association analysis. Linkage disequilibrium plot representing pairwise  $R^2$  in a grayscale. We selected 16 tagging SNPs found in the YRI population HapMap dataset within the IFNAR1 coding and noncoding sequences (including 2 kb upstream of the transcription start site).

SUPPLEMENTAL TABLE 1

Cerebral malaria-associated IFNAR1 variants are associated with alterations in expression levels of IFNAR1 and IL10RB by expression quantitative trait loci data extracted from Westra et al.<sup>36</sup>

| SNP        | SNP Chr:Pos | SNP alleles | Minor allele | Gene name | Z-score | P value  | FDR | Probe   | Probe Chr:Pos |
|------------|-------------|-------------|--------------|-----------|---------|----------|-----|---------|---------------|
| rs914142   | 21:33647677 | A/G         | G            | IFNAR1    | -14.75  | 3.01E-49 | 0   | 7550181 | 21:33653663   |
| rs914142   | 21:33647677 | A/G         | G            | IL10RB    | -5      | 5.63E-07 | 0   | 5050368 | 21:33590465   |
| rs12626750 | 21:33620255 | C/A         | A            | IFNAR1    | 11      | 3.80E-28 | 0   | 7550181 | 21:33653663   |
| rs12626750 | 21:33620255 | C/A         | A            | IL10RB    | 8.48    | 2.23E-17 | 0   | 5670719 | 21:33591282   |
| rs12626750 | 21:33620255 | C/A         | A            | IL10RB    | 4.88    | 1.06E-06 | 0   | 5050368 | 21:33590465   |
| rs1041867  | 21:33649122 | T/G         | T            | IL10RB    | 6.44    | 1.17E-10 | 0   | 5670719 | 21:33591282   |

FDR = false discovery rate; IFNAR1 = interferon-alpha receptor 1. A positive Z score indicates an increased gene expression. In some cases, multiple probes are used for the same gene. Associations with false discovery rate  $P < 0.01$  are reported.
